# Supplementary material
Source: PubMed Central journal article supplement (PMC2624573)
Supplement: NIHMS82653-supplement-01.pdf [file NIHMS82653-supplement-01.pdf]

MS# 07-PR-11-0568 - Effects of Prenatal Tobacco Exposure on Gene Expression Profiling in Umbilical Cord Tissue

Supplemental Table 1: All probes demonstrating significant differential regulation between smokers and non-smokers

| Probe ID     | Symbol   | FDR* adj. P-Val | Ratio (Smoker vs. Non-Smoker) | Cluster ID |
|--------------|----------|-----------------|-------------------------------|------------|
| 1564307_a_at | A2ML1    | 0               | -2.29                         | 1          |
| 202170_s_at  | AASDHPPT | 0.004           | -1.51                         | 1          |
| 243249_at    | ACIN1    | 0.001           | 1.59                          | 1          |
| 219935_at    | ADAMTS5  | 0.001           | -1.76                         | 1          |
| 222366_at    | ADNP     | 0.004           | 1.36                          | 1          |
| 226334_s_at  | AHSA2    | 0.002           | 1.37                          | 1          |
| 215336_at    | AKAP11   | 0.003           | 1.44                          | 1          |
| 241679_at    | AKAP12   | 0               | 1.79                          | 1          |
| 235926_at    | ANAPC5   | 0               | 1.66                          | 1          |
| 215504_x_at  | ANKRD10  | 0.001           | 1.38                          | 1          |
| 229858_at    | ANKRD17  | 0               | 1.55                          | 1          |
| 238439_at    | ANKRD22  | 0               | -1.62                         | 1          |
| 231118_at    | ANKRD35  | 0.002           | -1.34                         | 1          |
| 210873_x_at  | APOBEC3A | 0               | -2.78                         | 1          |
| 1554703_at   | ARHGEF10 | 0.001           | 1.57                          | 1          |
| 240008_at    | ARID1B   | 0               | 1.7                           | 1          |
| 202206_at    | ARL4C    | 0.003           | -1.41                         | 1          |
| 231825_x_at  | ATF7IP   | 0.003           | 1.39                          | 1          |
| 214594_x_at  | ATP8B1   | 0.001           | 1.69                          | 1          |
| 1559249_at   | ATXN1    | 0.004           | 1.46                          | 1          |
| 225612_s_at  | B3GNT5   | 0.001           | -1.48                         | 1          |
| 1559391_s_at | B4GALT5  | 0.002           | 1.65                          | 1          |
| 215907_at    | BACH2    | 0.002           | 1.43                          | 1          |
| 217986_s_at  | BAZ1A    | 0.003           | -1.4                          | 1          |
| 207655_s_at  | BLNK     | 0               | -1.67                         | 1          |
| 233036_at    | BNC2     | 0.002           | 1.56                          | 1          |
| 243431_at    | BTBD14A  | 0               | 2                             | 1          |
| 244165_at    | C10orf18 | 0.002           | 1.49                          | 1          |
| 242608_x_at  | C14orf44 | 0.002           | 1.35                          | 1          |
| 223484_at    | C15orf48 | 0               | -2.38                         | 1          |
| 208109_s_at  | C15orf5  | 0.001           | 1.47                          | 1          |
| 228865_at    | C1orf116 | 0               | -1.78                         | 1          |

|              |                                               |       |       |   |
|--------------|-----------------------------------------------|-------|-------|---|
| 219476_at    | C1orf116 ///<br>LOC653098                     | 0     | -1.98 | 1 |
| 220620_at    | C1orf42                                       | 0     | -2.68 | 1 |
| 209006_s_at  | C1orf63                                       | 0.002 | 1.42  | 1 |
| 219450_at    | C4orf19                                       | 0.003 | -1.37 | 1 |
| 1558426_x_at | C7orf19                                       | 0.004 | 1.47  | 1 |
| 229958_at    | C8orf61                                       | 0.005 | -1.35 | 1 |
| 216769_x_at  | C9orf150                                      | 0.002 | 1.68  | 1 |
| 218309_at    | CAMK2N1                                       | 0.001 | -1.35 | 1 |
| 233306_at    | CAST1                                         | 0.002 | 1.3   | 1 |
| 238549_at    | CBFA2T2                                       | 0.001 | 1.64  | 1 |
| 1553693_s_at | CBR4                                          | 0.004 | 1.6   | 1 |
| 208650_s_at  | CD24 ///<br>LOC647456                         | 0     | -2.29 | 1 |
| 232266_x_at  | CDC2L5                                        | 0.001 | 1.59  | 1 |
| 239442_at    | CEP68                                         | 0     | 1.4   | 1 |
| 215318_at    | CG012                                         | 0.001 | 1.7   | 1 |
| 226803_at    | CHMP4C                                        | 0.002 | -1.64 | 1 |
| 217528_at    | CLCA2                                         | 0.002 | -1.65 | 1 |
| 219529_at    | CLIC3                                         | 0.004 | -1.59 | 1 |
| 238913_at    | CPSF6                                         | 0.002 | 1.64  | 1 |
| 233073_at    | CRIM1                                         | 0     | 1.93  | 1 |
| 235803_at    | CRLF3                                         | 0     | 2.01  | 1 |
| 208069_x_at  | CSH1 /// CSH2 ///<br>CSHL1 /// GH1 ///<br>GH2 | 0.001 | 1.73  | 1 |
| 214731_at    | CTTNBP2NL                                     | 0     | 1.56  | 1 |
| 242440_at    | CUGBP1                                        | 0     | 2     | 1 |
| 244803_at    | DAP3                                          | 0     | 1.78  | 1 |
| 222859_s_at  | DAPP1                                         | 0.001 | -1.55 | 1 |
| 237290_at    | DDAH1                                         | 0.002 | 1.67  | 1 |
| 238193_at    | DDEF1                                         | 0     | 1.88  | 1 |
| 239311_at    | DHX57                                         | 0.003 | 1.35  | 1 |
| 229949_at    | DKFZP434A0131                                 | 0     | 1.49  | 1 |
| 227183_at    | DKFZp586C0721                                 | 0     | 1.7   | 1 |
| 1556820_a_at | DLEAH2                                        | 0     | 1.89  | 1 |
| 242611_at    | DOCK7                                         | 0.003 | 1.45  | 1 |
| 225645_at    | EHF                                           | 0     | -2.11 | 1 |
| 242550_at    | EIF3S9                                        | 0     | 1.93  | 1 |
| 233912_x_at  | ELMOD2                                        | 0.003 | 1.49  | 1 |

|              |                        |       |       |   |
|--------------|------------------------|-------|-------|---|
| 1556732_at   | EML4                   | 0.001 | 1.44  | 1 |
| 220161_s_at  | EPB41L4B               | 0     | -1.85 | 1 |
| 203780_at    | EVA1                   | 0.001 | -1.48 | 1 |
| 202345_s_at  | FABP5 ///<br>LOC653327 | 0.002 | -1.66 | 1 |
| 232628_at    | FAM13A1                | 0.003 | 1.61  | 1 |
| 1564424_at   | FAM62B                 | 0.001 | 1.71  | 1 |
| 226062_x_at  | FAM63A                 | 0.001 | 1.49  | 1 |
| 238460_at    | FAM83A                 | 0     | -1.48 | 1 |
| 1560813_at   | FBXL7                  | 0.001 | 1.6   | 1 |
| 205014_at    | FGFBP1                 | 0.005 | -1.58 | 1 |
| 1570515_a_at | FILIP1                 | 0.004 | -1.59 | 1 |
| 244112_x_at  | FLJ10159               | 0.001 | 1.66  | 1 |
| 1560199_x_at | FLJ11903               | 0.001 | 1.54  | 1 |
| 219995_s_at  | FLJ13841               | 0     | -2.3  | 1 |
| 235158_at    | FLJ14803               | 0.001 | -1.35 | 1 |
| 225325_at    | FLJ20160               | 0     | -1.57 | 1 |
| 220467_at    | FLJ21272               | 0.001 | 1.69  | 1 |
| 206548_at    | FLJ23556               | 0     | 2.19  | 1 |
| 244530_at    | FLJ25422               | 0.001 | 1.48  | 1 |
| 236322_at    | FLJ31951               | 0     | 1.84  | 1 |
| 1559964_at   | FLJ38717               | 0.001 | 1.66  | 1 |
| 1553145_at   | FLJ39653               | 0     | 1.61  | 1 |
| 244286_at    | FNBP1                  | 0.003 | 1.64  | 1 |
| 242029_at    | FNDC3B                 | 0.002 | 1.67  | 1 |
| 241993_x_at  | FOXP1                  | 0.001 | 1.42  | 1 |
| 215385_at    | FTO                    | 0.002 | 1.51  | 1 |
| 1566959_at   | GAB2                   | 0.003 | 1.61  | 1 |
| 228501_at    | GALNTL2                | 0.004 | -1.59 | 1 |
| 231552_at    | GAPVD1                 | 0.003 | 1.42  | 1 |
| 1569320_at   | GPBP1L1                | 0     | 1.83  | 1 |
| 233090_at    | GPC6                   | 0.003 | 1.47  | 1 |
| 205220_at    | GPR109B                | 0     | -1.79 | 1 |
| 237690_at    | GPR115                 | 0.003 | -1.61 | 1 |
| 1561195_at   | GPR137B                | 0     | 1.83  | 1 |
| 233427_x_at  | GPR64                  | 0.003 | 1.41  | 1 |
| 219936_s_at  | GPR87                  | 0.003 | -1.62 | 1 |
| 203108_at    | GPRC5A                 | 0     | -2.1  | 1 |
| 222830_at    | GRHL1                  | 0.001 | -1.74 | 1 |
| 215786_at    | HBXAP                  | 0.001 | 1.4   | 1 |
| 216229_x_at  | HCG2P7                 | 0.005 | 1.31  | 1 |
| 207730_x_at  | HDGF2                  | 0.002 | 1.56  | 1 |

|             |                                                                              |       |       |   |
|-------------|------------------------------------------------------------------------------|-------|-------|---|
| 230868_at   | HIAT1                                                                        | 0.001 | 1.38  | 1 |
| 1555318_at  | HIF3A                                                                        | 0.001 | 1.74  | 1 |
| 211597_s_at | HOP                                                                          | 0.002 | -1.51 | 1 |
| 207526_s_at | IL1RL1                                                                       | 0.002 | -1.67 | 1 |
| 1560172_at  | INTS10                                                                       | 0.003 | 1.32  | 1 |
| 215791_at   | ITSN1                                                                        | 0     | 2.07  | 1 |
| 241391_at   | JMJD1C                                                                       | 0.004 | 1.59  | 1 |
| 242725_at   | KDELR2                                                                       | 0.002 | 1.58  | 1 |
| 238271_x_at | KIAA0182                                                                     | 0.003 | 1.49  | 1 |
| 215268_at   | KIAA0754                                                                     | 0     | 1.97  | 1 |
| 207436_x_at | KIAA0894                                                                     | 0.001 | 1.58  | 1 |
| 239946_at   | KIAA0922                                                                     | 0     | 2.03  | 1 |
| 242920_at   | KIAA0999                                                                     | 0.002 | 1.67  | 1 |
| 232762_at   | KIAA1217                                                                     | 0.004 | 1.51  | 1 |
| 238774_at   | KIAA1267                                                                     | 0     | 1.89  | 1 |
| 231956_at   | KIAA1618                                                                     | 0.003 | 1.55  | 1 |
| 214964_at   | KIAA1856                                                                     | 0     | 1.68  | 1 |
| 233799_at   | KIFAP3                                                                       | 0.003 | 1.5   | 1 |
| 218963_s_at | KRT23                                                                        | 0     | -2.48 | 1 |
| 220267_at   | KRT24                                                                        | 0.005 | -1.58 | 1 |
| 1557835_at  | LA16c-360B4.1                                                                | 0.004 | 1.54  | 1 |
| 238299_at   | LASS5                                                                        | 0.001 | 1.68  | 1 |
| 232935_at   | LHFP                                                                         | 0.001 | 1.64  | 1 |
| 215978_x_at | LOC152719                                                                    | 0.002 | 1.55  | 1 |
| 232889_at   | LOC153561                                                                    | 0.003 | 1.63  | 1 |
| 232034_at   | LOC203274                                                                    | 0.001 | 1.44  | 1 |
| 235167_at   | LOC23117                                                                     | 0.003 | 1.64  | 1 |
| 236764_at   | LOC255130                                                                    | 0     | 1.71  | 1 |
| 229734_at   | LOC283174                                                                    | 0.001 | 1.42  | 1 |
| 225899_x_at | LOC388312 ///<br>FLJ45445 ///<br>LOC641693 ///<br>LOC641710 ///<br>LOC642788 | 0.002 | 1.52  | 1 |
| 238678_at   | LOC388312 ///<br>LOC641693 ///<br>LOC641710 ///<br>LOC642788                 | 0.001 | 1.42  | 1 |
| 235482_at   | LOC400960                                                                    | 0.004 | 1.45  | 1 |
| 215123_at   | LOC440345                                                                    | 0.001 | 1.74  | 1 |
| 1558220_at  | LOC440993                                                                    | 0     | 1.77  | 1 |

|              |                                                              |       |       |   |
|--------------|--------------------------------------------------------------|-------|-------|---|
| 209679_s_at  | LOC57228                                                     | 0.001 | -1.4  | 1 |
| 1557987_at   | LOC641298                                                    | 0.001 | 1.72  | 1 |
| 213605_s_at  | LOC643373 ///<br>LOC653080 ///<br>LOC653188 ///<br>LOC653412 | 0.004 | 1.6   | 1 |
| 243846_x_at  | LOC643481                                                    | 0     | 1.41  | 1 |
| 243049_at    | LOC643831                                                    | 0.001 | 1.42  | 1 |
| 242490_at    | LOC644010                                                    | 0.001 | 1.47  | 1 |
| 234105_at    | LOC644192                                                    | 0.003 | 1.41  | 1 |
| 1558569_at   | LOC645238                                                    | 0.004 | 1.6   | 1 |
| 236494_x_at  | LOC646848                                                    | 0.003 | 1.56  | 1 |
| 1557828_a_at | LOC646916                                                    | 0     | 1.78  | 1 |
| 242471_at    | LOC647135                                                    | 0.002 | 1.64  | 1 |
| 217653_x_at  | LOC653471 ///<br>LOC654000                                   | 0     | 1.98  | 1 |
| 1557360_at   | LRPPRC                                                       | 0     | 1.61  | 1 |
| 218816_at    | LRRC1                                                        | 0     | -1.36 | 1 |
| 215375_x_at  | LRRFIP1                                                      | 0.003 | 1.63  | 1 |
| 229584_at    | LRRK2                                                        | 0     | -1.43 | 1 |
| 242877_at    | LSM14A                                                       | 0.001 | 1.55  | 1 |
| 233518_at    | LSP1                                                         | 0.002 | 1.66  | 1 |
| 204952_at    | LYPD3                                                        | 0.003 | -1.61 | 1 |
| 1553407_at   | MACF1                                                        | 0.002 | 1.65  | 1 |
| 224650_at    | MAL2                                                         | 0     | -2.45 | 1 |
| 209373_at    | MALL                                                         | 0     | -1.69 | 1 |
| 232333_at    | MAML2                                                        | 0.001 | 1.59  | 1 |
| 1565889_at   | MAP3K7IP2                                                    | 0     | 1.54  | 1 |
| 242448_at    | MAP4K3                                                       | 0     | 1.57  | 1 |
| 238769_at    | MAP4K4                                                       | 0.001 | 1.67  | 1 |
| 202890_at    | MAP7                                                         | 0.001 | -1.5  | 1 |
| 226210_s_at  | MEG3                                                         | 0.002 | 1.67  | 1 |
| 212861_at    | MFSD5                                                        | 0.003 | -1.25 | 1 |
| 226783_at    | MGC15875                                                     | 0.003 | 1.42  | 1 |
| 232568_at    | MGC24103                                                     | 0.002 | 1.68  | 1 |
| 242225_at    | MON2                                                         | 0.003 | 1.44  | 1 |
| 214071_at    | MPPE1                                                        | 0.001 | -1.74 | 1 |
| 204885_s_at  | MSLN                                                         | 0.003 | -1.45 | 1 |
| 1566482_at   | MSRB3                                                        | 0     | 1.8   | 1 |
| 240271_at    | MTMR3                                                        | 0.002 | 1.45  | 1 |

|              |                                                                                     |       |       |   |
|--------------|-------------------------------------------------------------------------------------|-------|-------|---|
| 227238_at    | MUC15                                                                               | 0     | -1.87 | 1 |
| 220196_at    | MUC16                                                                               | 0.003 | -1.63 | 1 |
| 231941_s_at  | MUC20                                                                               | 0.002 | -1.66 | 1 |
| 242480_at    | MYST3                                                                               | 0     | 1.54  | 1 |
| 1569519_at   | NBPF1 ///<br>NBPF11 ///<br>NBPF20 ///<br>NBPF9 ///<br>NBPF10 ///<br>NBPF8           | 0.002 | 1.67  | 1 |
| 1562063_x_at | NBPF1 /// NBPF3<br>/// NBPF11 ///<br>NBPF20 ///<br>NBPF9 ///<br>NBPF10 ///<br>NBPF8 | 0.001 | 1.55  | 1 |
| 242191_at    | NBPF11 ///<br>NBPF9 ///<br>NBPF10                                                   | 0     | 1.74  | 1 |
| 232583_at    | NCK2                                                                                | 0.001 | 1.35  | 1 |
| 242369_x_at  | NCOA2                                                                               | 0.005 | 1.57  | 1 |
| 224799_at    | NDFIP2                                                                              | 0.003 | -1.54 | 1 |
| 203961_at    | NEBL                                                                                | 0     | -1.8  | 1 |
| 239519_at    | NRP1                                                                                | 0     | 1.55  | 1 |
| 242239_at    | NSUN6                                                                               | 0.001 | 1.53  | 1 |
| 243158_at    | NT5C2                                                                               | 0.004 | 1.53  | 1 |
| 209485_s_at  | OSBPL1A                                                                             | 0     | -1.56 | 1 |
| 222282_at    | PAPD4                                                                               | 0.005 | 1.42  | 1 |
| 215418_at    | PARVA                                                                               | 0.004 | 1.6   | 1 |
| 241956_at    | PCGF5                                                                               | 0.005 | 1.57  | 1 |
| 233270_x_at  | PCM1                                                                                | 0     | 1.65  | 1 |
| 238902_at    | PCMTD1                                                                              | 0.002 | 1.56  | 1 |
| 243993_at    | PCTK2                                                                               | 0.001 | 1.72  | 1 |
| 206792_x_at  | PDE4C                                                                               | 0.001 | 1.45  | 1 |
| 1556331_a_at | PDE4D                                                                               | 0.001 | 1.63  | 1 |
| 238592_at    | PDLIM3                                                                              | 0.005 | -1.57 | 1 |
| 1569150_x_at | PDLIM7                                                                              | 0     | 1.78  | 1 |
| 232776_at    | PDZRN3                                                                              | 0     | 1.49  | 1 |
| 217744_s_at  | PERP                                                                                | 0.001 | -1.73 | 1 |
| 221899_at    | PFAAP5                                                                              | 0.001 | 1.48  | 1 |
| 215179_x_at  | PGF                                                                                 | 0.001 | 1.48  | 1 |
| 222371_at    | PIAS1                                                                               | 0.005 | 1.57  | 1 |

|              |                          |       |       |   |
|--------------|--------------------------|-------|-------|---|
| 239274_at    | PICALM                   | 0.002 | 1.66  | 1 |
| 241905_at    | PIK3C2A                  | 0     | 1.78  | 1 |
| 239978_at    | PITPNB                   | 0.003 | 1.4   | 1 |
| 201860_s_at  | PLAT                     | 0.002 | -1.67 | 1 |
| 241509_at    | PLEKHA5                  | 0.002 | 1.21  | 1 |
| 201939_at    | PLK2                     | 0.003 | -1.63 | 1 |
| 204285_s_at  | PMAIP1                   | 0.001 | -1.62 | 1 |
| 242201_at    | PMS2L1                   | 0     | 1.45  | 1 |
| 215281_x_at  | POGZ                     | 0     | 1.82  | 1 |
| 1552621_at   | POLR2J2                  | 0.001 | 1.69  | 1 |
| 1552622_s_at | POLR2J2 ///<br>LOC441259 | 0.001 | 1.72  | 1 |
| 203407_at    | PPL                      | 0     | -1.81 | 1 |
| 226907_at    | PPP1R14C                 | 0     | -1.63 | 1 |
| 215586_at    | PPP3CB                   | 0     | 1.48  | 1 |
| 233611_at    | PRKG1                    | 0.002 | 1.66  | 1 |
| 237107_at    | PRKRA                    | 0.002 | 1.47  | 1 |
| 223797_at    | PRO2852                  | 0.001 | 1.61  | 1 |
| 219392_x_at  | PRR11                    | 0.001 | 1.46  | 1 |
| 238513_at    | PRRG4                    | 0.002 | -1.65 | 1 |
| 227192_at    | PRRT2                    | 0     | 1.56  | 1 |
| 213421_x_at  | PRSS3                    | 0.003 | -1.36 | 1 |
| 1560271_at   | PTBP2                    | 0     | 2.17  | 1 |
| 239121_at    | PTK2                     | 0.001 | 1.75  | 1 |
| 237664_at    | PTPLA                    | 0.004 | 1.34  | 1 |
| 242188_at    | PTPRG                    | 0.003 | 1.61  | 1 |
| 233089_at    | QRSL1                    | 0.001 | 1.23  | 1 |
| 228613_at    | RAB11FIP3                | 0.001 | 1.72  | 1 |
| 218186_at    | RAB25                    | 0.001 | -1.75 | 1 |
| 233702_x_at  | RABGEF1                  | 0.002 | 1.37  | 1 |
| 214435_x_at  | RALA                     | 0.003 | -1.33 | 1 |
| 227224_at    | RALGPS2                  | 0.001 | -1.35 | 1 |
| 239409_at    | RAP1A                    | 0     | 1.83  | 1 |
| 221872_at    | RARRES1                  | 0     | -2.28 | 1 |
| 1557432_at   | RASAL2                   | 0.001 | 1.75  | 1 |
| 239071_at    | RBBP4                    | 0.002 | 1.34  | 1 |
| 225846_at    | RBM35A                   | 0.001 | -1.68 | 1 |
| 233608_at    | RBMS3                    | 0     | 1.85  | 1 |
| 231961_at    | RBPM5                    | 0.004 | 1.5   | 1 |
| 228996_at    | RC3H1                    | 0.001 | -1.53 | 1 |
| 224366_s_at  | REPS1                    | 0.003 | -1.29 | 1 |
| 229943_at    | RFP2                     | 0.002 | -1.66 | 1 |

|              |           |       |       |   |
|--------------|-----------|-------|-------|---|
| 219554_at    | RHCG      | 0     | -1.86 | 1 |
| 239258_at    | RHOQ      | 0     | 1.91  | 1 |
| 215588_x_at  | RIOK3     | 0.002 | 1.41  | 1 |
| 221215_s_at  | RIPK4     | 0.004 | -1.33 | 1 |
| 242121_at    | RNF12     | 0     | 1.81  | 1 |
| 216621_at    | ROCK1     | 0.001 | 1.41  | 1 |
| 224618_at    | ROD1      | 0     | -1.34 | 1 |
| 233449_at    | RORA      | 0.002 | 1.54  | 1 |
| 1557512_at   | RSN       | 0.005 | 1.57  | 1 |
| 239251_at    | RTN4      | 0.001 | 1.51  | 1 |
| 237456_at    | RYBP      | 0.003 | 1.47  | 1 |
| 205916_at    | S100A7    | 0.001 | -1.69 | 1 |
| 202917_s_at  | S100A8    | 0.002 | -1.68 | 1 |
| 203535_at    | S100A9    | 0.001 | -1.69 | 1 |
| 204351_at    | S100P     | 0     | -2.1  | 1 |
| 214967_at    | SAMD4A    | 0.002 | 1.67  | 1 |
| 241798_at    | SCC-112   | 0.001 | 1.62  | 1 |
| 206884_s_at  | SCEL      | 0     | -2.39 | 1 |
| 232858_at    | SCMH1     | 0.004 | 1.37  | 1 |
| 203453_at    | SCNN1A    | 0     | -1.82 | 1 |
| 243963_at    | SDCCAG8   | 0.002 | 1.51  | 1 |
| 215209_at    | SEC24D    | 0.004 | 1.49  | 1 |
| 215204_at    | SENP6     | 0.004 | 1.58  | 1 |
| 212812_at    | SERINC5   | 0     | -1.48 | 1 |
| 217272_s_at  | SERPINB13 | 0     | -2.35 | 1 |
| 209719_x_at  | SERPINB3  | 0.004 | -1.61 | 1 |
| 206421_s_at  | SERPINB7  | 0     | -2.16 | 1 |
| 239544_at    | SETBP1    | 0.003 | 1.39  | 1 |
| 221768_at    | SFPQ      | 0.005 | 1.36  | 1 |
| 232597_x_at  | SFRS2IP   | 0     | 1.61  | 1 |
| 242837_at    | SFRS4     | 0     | 1.68  | 1 |
| 241223_x_at  | SFXN1     | 0.001 | 1.49  | 1 |
| 236010_at    | SH3D19    | 0.001 | 1.75  | 1 |
| 219915_s_at  | SLC16A10  | 0.001 | -1.64 | 1 |
| 1554593_s_at | SLC1A6    | 0.003 | -1.62 | 1 |
| 242578_x_at  | SLC22A3   | 0.004 | 1.44  | 1 |
| 1559232_a_at | SLC33A1   | 0.001 | 1.41  | 1 |
| 228485_s_at  | SLC44A1   | 0.002 | -1.35 | 1 |
| 241041_at    | SLC8A1    | 0.003 | 1.33  | 1 |
| 1561574_at   | SLIT3     | 0     | 1.66  | 1 |
| 203021_at    | SLPI      | 0.001 | -1.76 | 1 |
| 235693_at    | SMA3      | 0.003 | 1.62  | 1 |



|             |                                                                          |       |       |   |
|-------------|--------------------------------------------------------------------------|-------|-------|---|
| 215599_at   | SMA4 ///<br>LOC643367 ///<br>LOC643373 ///<br>LOC652924 ///<br>LOC653869 | 0     | 1.94  | 1 |
| 239238_at   | SMARCC1                                                                  | 0.003 | 1.48  | 1 |
| 236370_at   | SMURF1                                                                   | 0.001 | 1.68  | 1 |
| 233713_at   | SMYD2                                                                    | 0.002 | 1.64  | 1 |
| 1560741_at  | SNRPN                                                                    | 0     | 1.83  | 1 |
| 232784_at   | SNTB2                                                                    | 0.003 | 1.63  | 1 |
| 1559154_at  | SNX1                                                                     | 0.001 | 1.59  | 1 |
| 1559245_at  | SORBS1                                                                   | 0.002 | 1.47  | 1 |
| 1558815_at  | SORBS2                                                                   | 0.001 | 1.61  | 1 |
| 242025_at   | SOX5                                                                     | 0.002 | 1.67  | 1 |
| 202935_s_at | SOX9                                                                     | 0     | -2.06 | 1 |
| 1557804_at  | SP3                                                                      | 0.005 | 1.48  | 1 |
| 205185_at   | SPINK5                                                                   | 0     | -1.82 | 1 |
| 213796_at   | SPRR1A                                                                   | 0     | -2.36 | 1 |
| 205064_at   | SPRR1B                                                                   | 0     | -2    | 1 |
| 218990_s_at | SPRR3                                                                    | 0     | -2.42 | 1 |
| 216905_s_at | ST14                                                                     | 0.004 | -1.38 | 1 |
| 231891_at   | STAMBPL1                                                                 | 0.003 | 1.61  | 1 |
| 215299_x_at | SULT1A1                                                                  | 0.004 | 1.31  | 1 |
| 242646_at   | SUV420H1                                                                 | 0.002 | 1.65  | 1 |
| 1566191_at  | SUZ12                                                                    | 0     | 1.55  | 1 |
| 222214_at   | SUZ12P                                                                   | 0.001 | 1.45  | 1 |
| 1569512_at  | SVIL                                                                     | 0.002 | 1.62  | 1 |
| 241885_at   | TAF15                                                                    | 0.003 | 1.45  | 1 |
| 235925_at   | TCF12                                                                    | 0.001 | 1.45  | 1 |
| 236216_at   | TCF7L2                                                                   | 0.002 | 1.35  | 1 |
| 205513_at   | TCN1                                                                     | 0     | -2.27 | 1 |
| 1555392_at  | TES                                                                      | 0.002 | 1.66  | 1 |
| 242859_at   | TFCP2                                                                    | 0.001 | 1.74  | 1 |
| 205016_at   | TGFA                                                                     | 0.001 | -1.61 | 1 |
| 239605_x_at | TGFBR1                                                                   | 0.004 | 1.6   | 1 |
| 238883_at   | THRAP2                                                                   | 0.001 | 1.71  | 1 |
| 1558922_at  | TIA1                                                                     | 0.002 | 1.66  | 1 |
| 243184_at   | TJP1                                                                     | 0.004 | 1.59  | 1 |
| 236524_at   | TM2D1                                                                    | 0.004 | 1.58  | 1 |
| 215250_at   | TMEM111                                                                  | 0.003 | 1.35  | 1 |
| 242827_x_at | TNFAIP8                                                                  | 0.004 | 1.59  | 1 |
| 227812_at   | TNFRSF19                                                                 | 0.003 | -1.61 | 1 |

|              |         |       |       |   |
|--------------|---------|-------|-------|---|
| 238108_at    | TNKS    | 0.005 | 1.39  | 1 |
| 243834_at    | TNRC6A  | 0.003 | 1.37  | 1 |
| 237895_at    | TNRC6B  | 0     | 1.45  | 1 |
| 236167_at    | TNS3    | 0.003 | 1.37  | 1 |
| 213593_s_at  | TRA2A   | 0     | 1.59  | 1 |
| 202342_s_at  | TRIM2   | 0.001 | -1.6  | 1 |
| 202242_at    | TSPAN7  | 0     | -1.57 | 1 |
| 244842_x_at  | TUBGCP2 | 0.002 | 1.41  | 1 |
| 215604_x_at  | UBE2D2  | 0.002 | 1.46  | 1 |
| 243046_at    | UBE2D3  | 0.003 | 1.61  | 1 |
| 242673_at    | UBE3C   | 0.005 | 1.57  | 1 |
| 210064_s_at  | UPK1B   | 0     | -1.88 | 1 |
| 207365_x_at  | USP34   | 0.001 | 1.46  | 1 |
| 222316_at    | VDP     | 0.005 | 1.57  | 1 |
| 215729_s_at  | VGLL1   | 0     | -1.75 | 1 |
| 219768_at    | VTCN1   | 0.001 | -1.53 | 1 |
| 233637_at    | WDR42A  | 0.005 | 1.46  | 1 |
| 242968_at    | WHSC1L1 | 0.001 | 1.44  | 1 |
| 205990_s_at  | WNT5A   | 0.002 | -1.64 | 1 |
| 243561_at    | YAF2    | 0.002 | 1.67  | 1 |
| 1563468_at   | ZAK     | 0.003 | 1.61  | 1 |
| 219836_at    | ZBED2   | 0.005 | -1.57 | 1 |
| 233296_x_at  | ZBTB20  | 0.003 | 1.46  | 1 |
| 206169_x_at  | ZC3H7B  | 0.002 | 1.61  | 1 |
| 230713_at    | ZCCHC11 | 0.002 | 1.65  | 1 |
| 222816_s_at  | ZCCHC2  | 0     | -1.88 | 1 |
| 230332_at    | ZCCHC7  | 0.002 | 1.65  | 1 |
| 1557797_a_at | ZFHX1B  | 0.001 | 1.43  | 1 |
| 242797_x_at  | ZFR     | 0.001 | 1.68  | 1 |
| 1554638_at   | ZFYVE16 | 0.003 | 1.63  | 1 |
| 214715_x_at  | ZNF160  | 0.001 | 1.58  | 1 |
| 1556035_s_at | ZNF207  | 0     | 1.59  | 1 |
| 215012_at    | ZNF451  | 0.002 | 1.64  | 1 |
| 242343_x_at  | ZNF518  | 0     | 1.82  | 1 |
| 1559401_a_at | ZNF609  | 0.004 | 1.59  | 1 |
| 235493_at    | ZNF638  | 0.003 | 1.62  | 1 |
| 1557270_at   | ZNF69   | 0.002 | 1.65  | 1 |
| 242633_x_at  | ZNF75A  | 0.004 | 1.33  | 1 |
| 215191_at    | ---     | 0     | 2.12  | 1 |
| 238918_at    | ---     | 0     | 2.04  | 1 |
| 244387_at    | ---     | 0     | 2.03  | 1 |
| 1559410_at   | ---     | 0     | 2.02  | 1 |
| 235028_at    | ---     | 0     | 1.98  | 1 |

|              |     |       |      |   |
|--------------|-----|-------|------|---|
| 228697_at    | --- | 0     | 1.91 | 1 |
| 242476_at    | --- | 0     | 1.88 | 1 |
| 232355_at    | --- | 0     | 1.87 | 1 |
| 210230_at    | --- | 0     | 1.86 | 1 |
| 221205_at    | --- | 0     | 1.79 | 1 |
| 1553275_s_at | --- | 0.001 | 1.76 | 1 |
| 227576_at    | --- | 0.001 | 1.76 | 1 |
| 1569540_at   | --- | 0.001 | 1.75 | 1 |
| 217164_at    | --- | 0.001 | 1.75 | 1 |
| 230961_at    | --- | 0.001 | 1.74 | 1 |
| 1554948_at   | --- | 0.001 | 1.74 | 1 |
| 239735_at    | --- | 0.001 | 1.74 | 1 |
| 243827_at    | --- | 0.001 | 1.7  | 1 |
| 225239_at    | --- | 0.002 | 1.68 | 1 |
| 239129_at    | --- | 0.002 | 1.68 | 1 |
| 215139_at    | --- | 0.002 | 1.68 | 1 |
| 217536_x_at  | --- | 0.001 | 1.67 | 1 |
| 217679_x_at  | --- | 0.002 | 1.67 | 1 |
| 237768_x_at  | --- | 0.002 | 1.67 | 1 |
| 215029_at    | --- | 0.002 | 1.66 | 1 |
| 220728_at    | --- | 0.001 | 1.66 | 1 |
| 235716_at    | --- | 0.002 | 1.64 | 1 |
| 1566848_x_at | --- | 0.003 | 1.62 | 1 |
| 232511_at    | --- | 0.003 | 1.62 | 1 |
| 216628_at    | --- | 0.003 | 1.61 | 1 |
| 228623_at    | --- | 0.003 | 1.61 | 1 |
| 1562836_at   | --- | 0.004 | 1.6  | 1 |
| 224549_x_at  | --- | 0.002 | 1.59 | 1 |
| 217586_x_at  | --- | 0.002 | 1.59 | 1 |
| 1557996_at   | --- | 0.004 | 1.58 | 1 |
| 228030_at    | --- | 0.005 | 1.58 | 1 |
| 216858_x_at  | --- | 0.001 | 1.55 | 1 |
| 239301_at    | --- | 0     | 1.55 | 1 |
| 1558515_at   | --- | 0.003 | 1.54 | 1 |
| 234036_x_at  | --- | 0.001 | 1.54 | 1 |
| 230886_at    | --- | 0.004 | 1.51 | 1 |
| 217549_at    | --- | 0.002 | 1.49 | 1 |
| 210679_x_at  | --- | 0.003 | 1.49 | 1 |
| 242439_s_at  | --- | 0.005 | 1.49 | 1 |
| 241388_at    | --- | 0     | 1.43 | 1 |
| 235084_x_at  | --- | 0.002 | 1.4  | 1 |
| 229206_at    | --- | 0.005 | 1.4  | 1 |
| 239005_at    | --- | 0.001 | 1.39 | 1 |

|              |          |       |       |   |
|--------------|----------|-------|-------|---|
| 244310_at    | ---      | 0.004 | 1.38  | 1 |
| 231035_s_at  | ---      | 0.002 | -1.32 | 1 |
| 230734_x_at  | ---      | 0     | -1.36 | 1 |
| 238455_at    | ---      | 0.002 | -1.4  | 1 |
| 242317_at    | ---      | 0     | -1.45 | 1 |
| 228115_at    | ---      | 0     | -1.47 | 1 |
| 227747_at    | ---      | 0     | -1.51 | 1 |
| 236129_at    | ---      | 0.004 | -1.53 | 1 |
| 231929_at    | ---      | 0.001 | -1.57 | 1 |
| 231033_at    | ---      | 0.005 | -1.58 | 1 |
| 232151_at    | ---      | 0     | -1.6  | 1 |
| 225667_s_at  | ---      | 0.001 | -1.61 | 1 |
| 227314_at    | ---      | 0.003 | -1.61 | 1 |
| 236220_at    | ---      | 0.001 | -1.71 | 1 |
| 226535_at    | ---      | 0     | -1.77 | 1 |
| 237006_at    | AFF1     | 0.005 | 1.57  | 2 |
| 232286_at    | AFF3     | 0     | 1.46  | 2 |
| 203757_s_at  | CEACAM6  | 0     | -2.84 | 2 |
| 211657_at    | CEACAM6  | 0     | -2.6  | 2 |
| 244197_x_at  | CNOT2    | 0.002 | 1.61  | 2 |
| 201650_at    | KRT19    | 0     | -1.95 | 2 |
| 212531_at    | LCN2     | 0     | -2.18 | 2 |
| 242722_at    | LMO7     | 0.002 | -1.5  | 2 |
| 214902_x_at  | LPP      | 0.001 | 1.7   | 2 |
| 244450_at    | MAK      | 0.002 | 1.66  | 2 |
| 204777_s_at  | MAL      | 0     | -2.17 | 2 |
| 1558111_at   | MBNL1    | 0.004 | 1.49  | 2 |
| 242671_at    | MID1     | 0     | 1.49  | 2 |
| 237491_at    | MYH10    | 0     | 2.03  | 2 |
| 1568760_at   | MYH11    | 0     | 2.23  | 2 |
| 225301_s_at  | MYO5B    | 0     | -1.79 | 2 |
| 203215_s_at  | MYO6     | 0.003 | -1.62 | 2 |
| 232169_x_at  | NDUFS8   | 0.002 | 1.48  | 2 |
| 233004_x_at  | NFIA     | 0.003 | 1.39  | 2 |
| 242235_x_at  | NRD1     | 0.003 | 1.32  | 2 |
| 1566785_x_at | NSF      | 0     | 1.46  | 2 |
| 229396_at    | OVOL1    | 0.004 | -1.31 | 2 |
| 1569346_a_at | P2RX1    | 0.004 | 1.59  | 2 |
| 240450_at    | PAPPA    | 0.003 | 1.61  | 2 |
| 1559394_a_at | ROR1     | 0     | 1.89  | 2 |
| 204614_at    | SERPINB2 | 0     | -2.25 | 2 |
| 239448_at    | SMAD3    | 0.002 | 1.64  | 2 |

|              |         |       |       |   |
|--------------|---------|-------|-------|---|
| 202286_s_at  | TACSTD2 | 0     | -1.89 | 2 |
| 229434_at    | HNRPD   | 0.003 | 1.63  | 3 |
| 206848_at    | HOXA7   | 0     | 1.49  | 3 |
| 237377_at    | IGF1R   | 0.001 | 1.7   | 3 |
| 212657_s_at  | IL1RN   | 0.001 | -1.72 | 3 |
| 1569409_x_at | INHA    | 0.002 | 1.43  | 3 |
| 206104_at    | ISL1    | 0.004 | -1.59 | 3 |
| 208083_s_at  | ITGB6   | 0     | -1.95 | 3 |
| 226189_at    | ITGB8   | 0.003 | -1.62 | 3 |
| 244457_at    | ITPR2   | 0.001 | 1.42  | 3 |
| 214599_at    | IVL     | 0     | -2.11 | 3 |
| 216187_x_at  | KNS2    | 0.002 | 1.42  | 3 |
| 1565689_at   | KPNA3   | 0     | 1.5   | 3 |
| 207935_s_at  | KRT13   | 0     | -2    | 3 |
| 204734_at    | KRT15   | 0     | -1.84 | 3 |
| 213240_s_at  | KRT4    | 0     | -1.84 | 3 |
| 213680_at    | KRT6B   | 0     | -2.39 | 3 |
| 216005_at    | TNC     | 0     | 2.12  | 3 |
| 244010_at    | ABP1    | 0.004 | 1.61  | 4 |
| 232058_at    | ACTN4   | 0     | 1.79  | 4 |
| 235368_at    | ADAMTS5 | 0.005 | -1.58 | 4 |
| 203180_at    | ALDH1A3 | 0     | -2.31 | 4 |
| 202203_s_at  | AMFR    | 0.002 | -1.65 | 4 |
| 226663_at    | ANKRD10 | 0.001 | 1.7   | 4 |
| 242110_at    | ARHGAP5 | 0.001 | 1.72  | 4 |
| 1559436_x_at | ARRB2   | 0.004 | 1.48  | 4 |
| 232744_x_at  | ATXN1   | 0     | 2.28  | 4 |
| 1565804_at   | ATXN1   | 0     | 2.16  | 4 |
| 236404_at    | ATXN1   | 0     | 2.06  | 4 |
| 238987_at    | B4GALT1 | 0.003 | 1.61  | 4 |
| 238393_at    | BMPR2   | 0.002 | 1.64  | 4 |
| 242551_at    | C18orf1 | 0.004 | 1.6   | 4 |
| 215198_s_at  | CALD1   | 0     | 1.64  | 4 |
| 215199_at    | CALD1   | 0     | 1.69  | 4 |
| 229571_at    | CALM2   | 0.005 | 1.2   | 4 |
| 235190_at    | CALM2   | 0     | 1.65  | 4 |
| 239179_at    | CAMK2G  | 0     | 1.84  | 4 |
| 234135_x_at  | CBR4    | 0.002 | 1.65  | 4 |
| 232347_x_at  | CBR4    | 0     | 1.61  | 4 |
| 266_s_at     | CD24    | 0     | -2.11 | 4 |
| 208651_x_at  | CD24    | 0.002 | -1.66 | 4 |
| 209771_x_at  | CD24    | 0     | -1.93 | 4 |

|              |         |       |       |   |
|--------------|---------|-------|-------|---|
| 216379_x_at  | CD24    | 0     | -1.98 | 4 |
| 201926_s_at  | CD55    | 0     | -1.61 | 4 |
| 1555950_a_at | CD55    | 0.001 | -1.54 | 4 |
| 201925_s_at  | CD55    | 0     | -1.57 | 4 |
| 201131_s_at  | CDH1    | 0     | -1.83 | 4 |
| 236313_at    | CDKN2B  | 0.001 | -1.69 | 4 |
| 205709_s_at  | CDS1    | 0     | -1.88 | 4 |
| 226185_at    | CDS1    | 0.001 | -1.65 | 4 |
| 209498_at    | CEACAM1 | 0     | -1.82 | 4 |
| 206165_s_at  | CLCA2   | 0.003 | -1.61 | 4 |
| 206417_at    | CNGA1   | 0.001 | -1.34 | 4 |
| 233109_at    | COL12A1 | 0.002 | 1.64  | 4 |
| 237624_at    | COL4A2  | 0     | 1.82  | 4 |
| 206475_x_at  | CSH1    | 0.002 | 2.49  | 4 |
| 211739_x_at  | CSH1    | 0     | 2.49  | 4 |
| 202493_x_at  | CSH1    | 0     | 2.46  | 4 |
| 208356_x_at  | CSH1    | 0     | 2.45  | 4 |
| 208357_x_at  | CSH1    | 0     | 2.49  | 4 |
| 208342_x_at  | CSH2    | 0     | 1.89  | 4 |
| 203807_x_at  | CSH2    | 0     | 2.39  | 4 |
| 208341_x_at  | CSH2    | 0     | 2.2   | 4 |
| 208293_x_at  | CSHL1   | 0.001 | 1.71  | 4 |
| 205958_x_at  | CSHL1   | 0     | 2.12  | 4 |
| 208294_x_at  | CSHL1   | 0     | 2.03  | 4 |
| 208295_x_at  | CSHL1   | 0     | 1.97  | 4 |
| 207285_x_at  | CSHL1   | 0     | 1.9   | 4 |
| 1556007_s_at | CSNK1A1 | 0.003 | 1.55  | 4 |
| 242467_at    | CSNK1A1 | 0.002 | 1.65  | 4 |
| 240221_at    | CSNK1A1 | 0.001 | 1.57  | 4 |
| 239228_at    | CSNK2A1 | 0     | 1.67  | 4 |
| 206595_at    | CST6    | 0     | -1.89 | 4 |
| 1570507_at   | CTNNB1  | 0     | 1.87  | 4 |
| 238884_at    | CTNND1  | 0.003 | 1.36  | 4 |
| 225647_s_at  | CTSC    | 0     | -1.79 | 4 |
| 225646_at    | CTSC    | 0.004 | -1.6  | 4 |
| 1570151_at   | CUTL1   | 0     | 1.8   | 4 |
| 240798_at    | CUTL1   | 0     | 2.1   | 4 |
| 1558624_at   | CUTL1   | 0     | 1.95  | 4 |
| 1566243_at   | CUTL1   | 0     | 1.92  | 4 |
| 226374_at    | CXADR   | 0     | -1.86 | 4 |
| 205370_x_at  | DBT     | 0.001 | 1.38  | 4 |
| 1559780_at   | DDAH1   | 0     | 1.93  | 4 |

|              |               |       |       |   |
|--------------|---------------|-------|-------|---|
| 1558828_s_at | DKFZp586C0721 | 0     | 2     | 4 |
| 1556821_x_at | DLEAH2        | 0     | 2.02  | 4 |
| 204751_x_at  | DSC2          | 0     | -1.97 | 4 |
| 235075_at    | DSG3          | 0     | -1.84 | 4 |
| 205595_at    | DSG3          | 0.003 | -1.63 | 4 |
| 209365_s_at  | ECM1          | 0.002 | -1.46 | 4 |
| 206254_at    | EGF           | 0.004 | -1.59 | 4 |
| 232541_at    | EGFR          | 0.003 | 1.63  | 4 |
| 221773_at    | ELK3          | 0.002 | -1.31 | 4 |
| 233940_at    | EML4          | 0     | 1.5   | 4 |
| 213895_at    | EMP1          | 0     | -2.1  | 4 |
| 201324_at    | EMP1          | 0.001 | -1.76 | 4 |
| 201325_s_at  | EMP1          | 0     | -1.83 | 4 |
| 223427_s_at  | EPB41L4B      | 0     | -1.42 | 4 |
| 1561167_at   | ETV6          | 0     | 2.03  | 4 |
| 203779_s_at  | EVA1          | 0.003 | -1.47 | 4 |
| 215206_at    | EXT1          | 0.004 | 1.6   | 4 |
| 242126_at    | EXT1          | 0     | 2.11  | 4 |
| 237310_at    | EXT1          | 0     | 1.86  | 4 |
| 239227_at    | EXT1          | 0.001 | 1.74  | 4 |
| 232174_at    | EXT1          | 0.001 | 1.71  | 4 |
| 213506_at    | F2RL1         | 0.001 | -1.69 | 4 |
| 233276_at    | FBXL7         | 0     | 1.96  | 4 |
| 241457_at    | FBXL7         | 0     | 1.9   | 4 |
| 207822_at    | FGFR1         | 0.003 | 1.33  | 4 |
| 215404_x_at  | FGFR1         | 0.004 | 1.46  | 4 |
| 234098_at    | FLJ10159      | 0     | 1.76  | 4 |
| 235629_at    | FN1           | 0.004 | 1.61  | 4 |
| 239453_at    | FNBP1         | 0     | 1.77  | 4 |
| 230389_at    | FNBP1         | 0     | 1.69  | 4 |
| 232472_at    | FNDC3B        | 0     | 1.82  | 4 |
| 231108_at    | FUS           | 0.001 | 1.44  | 4 |
| 243006_at    | FYN           | 0.001 | 1.52  | 4 |
| 205044_at    | GABRP         | 0     | -2.53 | 4 |
| 201724_s_at  | GALNT1        | 0     | -1.4  | 4 |
| 203397_s_at  | GALNT3        | 0.001 | -1.51 | 4 |
| 223434_at    | GBP3          | 0.004 | -1.6  | 4 |
| 205840_x_at  | GH1           | 0.003 | 1.61  | 4 |
| 211151_x_at  | GH1           | 0     | 1.79  | 4 |
| 223278_at    | GJB2          | 0     | -1.79 | 4 |
| 241865_at    | GNB1          | 0     | 1.67  | 4 |
| 215203_at    | GOLGA4        | 0.001 | 1.73  | 4 |
| 243193_at    | GPC3          | 0.001 | 1.65  | 4 |

|              |           |       |       |   |
|--------------|-----------|-------|-------|---|
| 232453_at    | GPC6      | 0     | 1.7   | 4 |
| 215387_x_at  | GPC6      | 0.004 | 1.6   | 4 |
| 232002_at    | GPI       | 0.001 | 1.61  | 4 |
| 240452_at    | GSPT1     | 0.002 | 1.67  | 4 |
| 222104_x_at  | GTF2H3    | 0.003 | 1.41  | 4 |
| 206647_at    | HBZ       | 0     | 2.26  | 4 |
| 211990_at    | HLA-DPA1  | 0.004 | -1.59 | 4 |
| 213831_at    | HLA-DQA1  | 0.003 | -1.62 | 4 |
| 209480_at    | HLA-DQB1  | 0.001 | -1.72 | 4 |
| 212998_x_at  | HLA-DQB1  | 0.003 | -1.62 | 4 |
| 234066_at    | IL1RL1    | 0.004 | -1.6  | 4 |
| 216614_at    | ITPR2     | 0.001 | 1.71  | 4 |
| 1569041_at   | JMJD1C    | 0     | 2.2   | 4 |
| 209211_at    | KLF5      | 0     | -1.98 | 4 |
| 233224_at    | KPNA3     | 0.001 | 1.58  | 4 |
| 235060_at    | LOC23117  | 0.002 | 1.67  | 4 |
| 232544_at    | LOC255130 | 0     | 1.84  | 4 |
| 238449_at    | LOC440345 | 0.001 | 1.76  | 4 |
| 1557293_at   | LOC440993 | 0     | 1.81  | 4 |
| 233824_at    | LPP       | 0     | 2.14  | 4 |
| 243874_at    | LPP       | 0     | 1.89  | 4 |
| 240866_at    | LPP       | 0     | 1.74  | 4 |
| 232168_x_at  | MACF1     | 0.002 | 1.65  | 4 |
| 234645_at    | MAML2     | 0     | 1.8   | 4 |
| 242405_at    | MAML2     | 0.002 | 1.65  | 4 |
| 244414_at    | MAML2     | 0.003 | 1.63  | 4 |
| 1556658_a_at | MBNL1     | 0     | 2.23  | 4 |
| 1556657_at   | MBNL1     | 0     | 2.14  | 4 |
| 238558_at    | MBNL1     | 0     | 1.89  | 4 |
| 236558_at    | MBNL1     | 0.001 | 1.76  | 4 |
| 241681_at    | MBNL1     | 0.002 | 1.65  | 4 |
| 235077_at    | MEG3      | 0     | 1.83  | 4 |
| 205413_at    | MPPED2    | 0     | -1.89 | 4 |
| 227241_at    | MUC15     | 0     | -1.76 | 4 |
| 226622_at    | MUC20     | 0.001 | -1.61 | 4 |
| 203962_s_at  | NEBL      | 0.001 | -1.71 | 4 |
| 229422_at    | NRD1      | 0     | 1.59  | 4 |
| 1569180_at   | NSF       | 0     | 2.13  | 4 |
| 1569181_x_at | NSF       | 0     | 2.03  | 4 |
| 1569345_at   | P2RX1     | 0     | 1.92  | 4 |
| 1556277_a_at | PAPD4     | 0.004 | 1.42  | 4 |
| 236610_at    | PDE4D     | 0     | 1.77  | 4 |



|              |           |       |       |   |
|--------------|-----------|-------|-------|---|
| 243586_at    | PDE4D     | 0.001 | 1.75  | 4 |
| 1569149_at   | PDLIM7    | 0     | 1.81  | 4 |
| 1566551_at   | PDZRN3    | 0     | 1.9   | 4 |
| 233286_at    | PDZRN3    | 0     | 1.78  | 4 |
| 233442_at    | PDZRN3    | 0     | 1.74  | 4 |
| 1565743_at   | PFAAP5    | 0.002 | 1.67  | 4 |
| 214753_at    | PFAAP5    | 0.001 | 1.65  | 4 |
| 235985_at    | PITPNB    | 0.001 | 1.62  | 4 |
| 238040_at    | POGZ      | 0     | 1.85  | 4 |
| 241897_at    | RBPMS     | 0     | 2.37  | 4 |
| 207837_at    | RBPMS     | 0     | 1.94  | 4 |
| 244265_at    | RERE      | 0.003 | 1.41  | 4 |
| 232231_at    | RUNX2     | 0     | -1.84 | 4 |
| 232056_at    | SCEL      | 0     | -2.2  | 4 |
| 1554921_a_at | SCEL      | 0     | -2.25 | 4 |
| 211361_s_at  | SERPINB13 | 0     | -2.33 | 4 |
| 237157_at    | SH3D19    | 0     | 1.93  | 4 |
| 1570482_at   | SLC22A3   | 0.002 | 1.67  | 4 |
| 242736_at    | SORBS1    | 0.001 | 1.74  | 4 |
| 240120_at    | SORBS2    | 0     | 2.12  | 4 |
| 233720_at    | SORBS2    | 0     | 2.04  | 4 |
| 220858_at    | SORBS2    | 0     | 1.64  | 4 |
| 202936_s_at  | SOX9      | 0     | -1.8  | 4 |
| 214549_x_at  | SPRR1A    | 0.002 | -1.66 | 4 |
| 232082_x_at  | SPRR3     | 0.004 | -1.58 | 4 |
| 1558592_at   | SVIL      | 0     | 1.69  | 4 |
| 227891_s_at  | TAF15     | 0     | 1.76  | 4 |
| 232522_at    | TCF7L2    | 0.002 | 1.5   | 4 |
| 236094_at    | TCF7L2    | 0     | 1.46  | 4 |
| 1562454_at   | TCF7L2    | 0.005 | 1.37  | 4 |
| 216109_at    | THRAP2    | 0     | 1.73  | 4 |
| 229574_at    | TRA2A     | 0     | 1.78  | 4 |
| 215945_s_at  | TRIM2     | 0.004 | -1.3  | 4 |
| 240383_at    | UBE2D3    | 0     | 1.85  | 4 |
| 242403_at    | UBE2D3    | 0.001 | 1.71  | 4 |
| 210065_s_at  | UPK1B     | 0     | -1.79 | 4 |
| 233595_at    | USP34     | 0.004 | 1.61  | 4 |
| 222357_at    | ZBTB20    | 0.004 | 1.48  | 4 |
| 234032_at    | ZCCHC7    | 0     | 1.86  | 4 |
| 239296_at    | ZFHX1B    | 0.001 | 1.54  | 4 |
| 239937_at    | ZNF207    | 0.001 | 1.71  | 4 |
| 231848_x_at  | ZNF207    | 0.001 | 1.65  | 4 |
| 239243_at    | ZNF638    | 0     | 1.85  | 4 |

|             |       |       |       |    |
|-------------|-------|-------|-------|----|
| 236355_s_at | ---   | 0.003 | 1.43  | 4  |
| 236009_at   | ---   | 0.001 | -1.56 | 4  |
| 229011_at   | ---   | 0.003 | -1.64 | 4  |
| 241788_x_at | ACTN4 | 0     | 2.21  | NC |
| 244753_at   | ACTN4 | 0     | 1.99  | NC |
| 205525_at   | CALD1 | 0     | 1.69  | NC |
| 209212_s_at | KLF5  | 0.002 | -1.57 | NC |
| 242407_at   | RERE  | 0     | 1.56  | NC |

\*FDR: False discovery rate. FDR adjusted p-values smaller than  $p = 0.0005$  were rounded down to the value of 0.

NC: Probes that were not included in clusters 1-4, but that showed significantly different expression ( $p < 0.0005$ ) between smokers and nonsmokers
